# Supplementary material for: Leflunomide versus azathioprine for maintenance therapy of lupus nephritis: a prospective, multicentre, randomised trial and long-term follow-up
Source: HighWire-hosted journal article supplement (doi:10.1136/ard-2022-222486), 2022-07-04
Supplement: ard-2022-222486supp001_data_supplement.pdf [file ard-2022-222486supp001_data_supplement.pdf]

## SUPPLEMENTARY MATERIAL FOR

### **Leflunomide Versus Azathioprine for Maintenance Therapy of Lupus Nephritis: A Prospective, Multicenter, Randomized Trial and Long-term Follow-up**

Qiong Fu,<sup>1†</sup> Chunmei Wu,<sup>1†</sup> Min Dai,<sup>1†</sup> Suli Wang,<sup>1</sup> Jianhua Xu,<sup>2</sup> Lie Dai,<sup>3</sup> Zhijun Li,<sup>4</sup> Lan He,<sup>5</sup> Xiaochun Zhu,<sup>6</sup> Lingyun Sun,<sup>7</sup> Liangjing Lu,<sup>1\*</sup> Chunde Bao<sup>1\*</sup>

#### **The supplemental material includes:**

- 1) Supplementary Figure 1
- 2) Supplementary Table 1-2

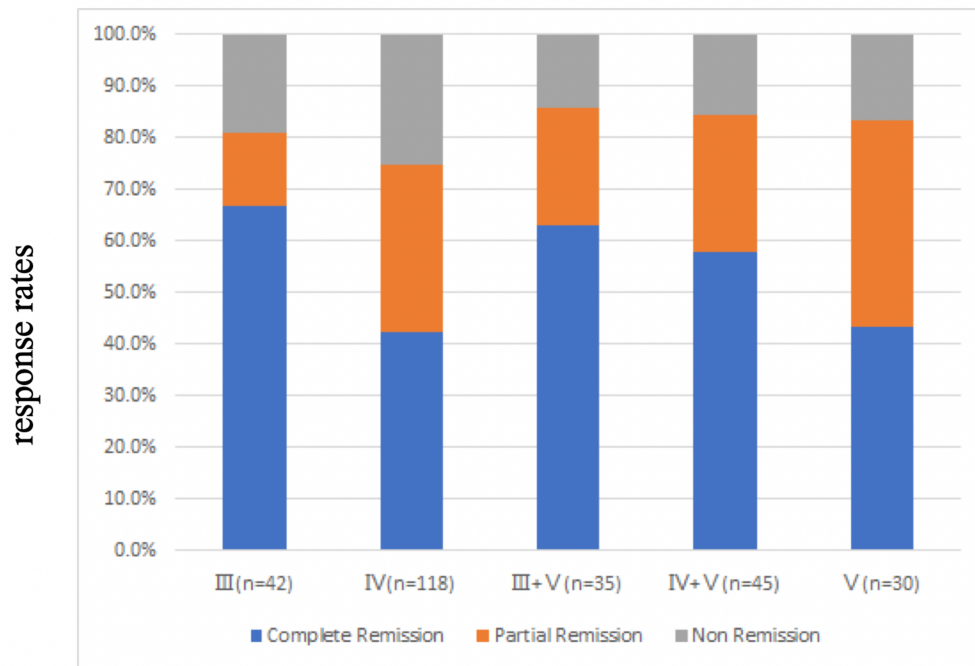

**Supplementary Figure 1.** Kidney response rates after induction therapy based on initial kidney biopsy class. Those who achieved complete remission and partial remission were enrolled in the maintenance therapy.

**Supplementary Table 1. Demographic and Disease Characteristics of the Patients at Baseline of Induction Therapy.**

| Characteristics                             | Total<br>n=270 | *215 patients who enrolled maintenance therapy |                             |
|---------------------------------------------|----------------|------------------------------------------------|-----------------------------|
|                                             |                | Leflunomide Group<br>n=108                     | Azathioprine Group<br>n=107 |
| Age - yr                                    | 32.4±10.4      | 30.8±9.1                                       | 33.2±10.9                   |
| Female sex - no. (%)                        | 236 (87.4%)    | 98 (90.7%)                                     | 92 (86.0%)                  |
| Duration of lupus nephritis - months        | 16.3±33.7      | 12.8±28.0                                      | 14.7±31.0                   |
| Organ involvement — no. (%)                 |                |                                                |                             |
| Mucocutaneous involvement                   | 101 (37.4%)    | 34 (31.5%)                                     | 42 (39.3%)                  |
| Musculoskeletal involvement                 | 82 (30.4%)     | 26 (24.1%)                                     | 37 (34.6%)                  |
| Serositis                                   | 36 (13.3%)     | 12 (11.1%)                                     | 14 (13.1%)                  |
| Leukopenia and/or Thrombocytopenia          | 50 (18.5%)     | 22 (20.4%)                                     | 15 (14.0%)                  |
| Anemia                                      | 116 (43.0%)    | 46 (42.6%)                                     | 42 (39.3%)                  |
| Fasting blood glucose (mmol/L)              | 4.8±1.1        | 4.9±0.8                                        | 4.8±1.1                     |
| Systolic BP (mmHg)                          | 131.3±18.2     | 128.6±17.4                                     | 133.0±18.8                  |
| Diastolic BP (mmHg)                         | 83.3±12.6      | 82.0±12.3                                      | 83.2±11.4                   |
| Hypertension — no. of patients (%)          | 81 (30.0%)     | 29 (26.9%)                                     | 31 (29.0%)                  |
| Kidney-biopsy class — no. of patients (%)   |                |                                                |                             |
| III or III + V                              | 77 (28.5%)     | 33 (30.6%)                                     | 29 (27.1%)                  |
| IV or IV + V                                | 163 (60.4%)    | 67 (62.0%)                                     | 62 (57.9%)                  |
| V only                                      | 30 (11.1%)     | 8 (7.4%)                                       | 16 (15.0%)                  |
| #Kidney biopsy activity index score         | 6.9±3.7        | 6.9±3.5                                        | 6.3±3.6                     |
| #Kidney biopsy chronicity index score       | 2.1±1.9        | 1.8±1.5                                        | 2.3±2.2                     |
| Urinary protein — mg/24 hr                  | 3072±2274      | 3216±2468                                      | 3037±2269                   |
| Active urine sediment — no. of patients (%) | 167 (61.9%)    | 65 (60.2%)                                     | 65 (60.7%)                  |

|                                                                    |             |            |            |
|--------------------------------------------------------------------|-------------|------------|------------|
| Serum albumin — g/L                                                | 29.4±7.4    | 29.8±7.5   | 29.9±7.8   |
| Serum creatinine — µmol/L                                          | 69.6±31.6   | 69.5±26.7  | 64.7±28.3  |
| Estimated GFR — mL/minute/1.73m <sup>2</sup>                       | 132.5±46.0  | 128.5±44.0 | 133.5±41.0 |
| Serum C3 — mg/dL                                                   | 528±265     | 529±268    | 538±290    |
| Serum C4 — mg/dL                                                   | 112.7±94.0  | 99.2±75.6  | 114.1±89.7 |
| Anti-dsDNA antibody positive — no. of patients (%)                 | 199 (73.7%) | 86 (79.6%) | 77 (72.0%) |
| SLEDAI score                                                       | 12.20±4.47  | 12.22±4.32 | 12.18±4.65 |
| ACEI/ARB use — no. (%)                                             | 73 (27.0%)  | 31 (28.7%) | 26 (24.3%) |
| <sup>§</sup> Other kinds of antihypertensive medications — no. (%) | 24 (8.9%)   | 9 (8.3%)   | 8 (7.5%)   |

\*baseline characteristics at the beginning of induction phase in 215 patients who achieved clinical response in the induction phase and enrolled in the maintenance therapy.

#the kidney biopsy activity index score and chronicity index score were calculated based on 236 available data (94 diagnostic biopsies in LEF group and 94 in AZA group, respectively).

<sup>§</sup>Other kinds of antihypertensive medications included: calcium channel blocker, β receptor blocker and diuretic.

**Supplementary Table 2. Secondary endpoints over the 3-year study.**

| Characteristics                                | Baseline   |            | 6 months   |            | 12 months  |            | 24months   |            | 36 months  |            |
|------------------------------------------------|------------|------------|------------|------------|------------|------------|------------|------------|------------|------------|
|                                                | LEF        | AZA        |
|                                                | (n=108)    | (n=107)    | (n=96)     | (n=95)     | (n=93)     | (n=89)     | (n=80)     | (n=75)     | (n=72)     | (n=65)     |
| 24h proteinuria, g (mean ± SD)                 | 0.542±0.5  | 0.451±0.4  | 0.370±0.4  | 0.364±0.3  | 0.329±0.3  | 0.274±0.2  | 0.240±0.2  | 0.149±0.1  | 0.245±0.2  | 0.240±0.3  |
| Serum albumin, g/L (mean ± SD)                 | 41.1±3.8   | 41.5±4.1   | 42.3±4.1   | 43.9±4.2   | 44.7±3.3   | 46.1±3.6   | 43.8±3.3   | 44.8±3.5   | 43.6±6.4   | 47.2±4.6   |
| Serum creatinine, µmol/L (mean ± SD)           | 67.2±20.8  | 66.8±19.0  | 62.7±17.0  | 67.2±20.1  | 65.4±26.0  | 66.2±19.1  | 63.0±15.3  | 60.4±14.2  | 60.0±14.6  | 61.4±13.4  |
| eGFR, mL/minute/1.73m <sup>2</sup> (mean ± SD) | 132.6±44.0 | 132.7±38.3 | 140.8±42.7 | 134.4±36.6 | 143.3±46.8 | 137.2±35.7 | 140.2±39.6 | 145.3±36.6 | 144.0±36.2 | 140.3±32.0 |
| Serum C3, mg/dL (mean ± SD)                    | 848±236    | 891±203    | 862±286    | 891±295    | 881±211    | 1003±211   | 849±257    | 890±226    | 859±262    | 930±180    |
| Serum C4, mg/dL (mean ± SD)                    | 180±103    | 194±70     | 208±106    | 226±205    | 214±174    | 178±81     | 188±76     | 240±238    | 181±75     | 188±74     |
| Anti-dsDNA antibodies (+, %)                   | 41.7%      | 40.6%      | 43.5%      | 38.5%      | 47.4%      | 50.0%      | 42.9%      | 11.1%      | 25.0%      | 33.3%      |
| Anti-dsDNA antibodies, IU/mL (mean ± SD)       | 26.1±54.4  | 14.8±21.4  | 11.9±11.2  | 14.7±34.0  | 11.0±12.7  | 15.7±16.1  | 5.0±4.6    | 9.7±13.0   | 23.7±44.2  | 23.3±28.0  |
| SLEDAI (mean ± SD)                             | 2.4±3.0    | 2.1±3.0    | 2.2±2.0    | 2.0±2.8    | 1.9±1.7    | 1.7±1.0    | 1.7±0.9    | 1.5±0.8    | 1.7±1.4    | 1.6±1.0    |
